# Supplementary material
Source: ML conference proceedings conference paper supplement (https://openreview.net/forum?id=f7sCpkcSB3)
Supplement: supplementary_material [file anonymous_link.pdf › anonymous_link.pdf]

[https://osf.io/atx5b/?view\\_only=36553019ed184fca89eb47204a1ac732](https://osf.io/atx5b/?view_only=36553019ed184fca89eb47204a1ac732)
